# Supplementary material for: Comparison of the volatile profile of vine-shoots and oak chips by headspace-gas chromatography-mass spectrometry (HS-GC-MS)
Source: Royal Society of Chemistry journal article supplement (doi:10.1039/c4ay02401j), 2015-01-01
Supplement: c4ay02401j1.pdf [file c4ay02401j1.pdf]

**Supplementary Figure 1.** Chromatograms from Malbec vine shoots after 6, 20 and 40 min heating time at 180 °C (A, B and C, respectively).

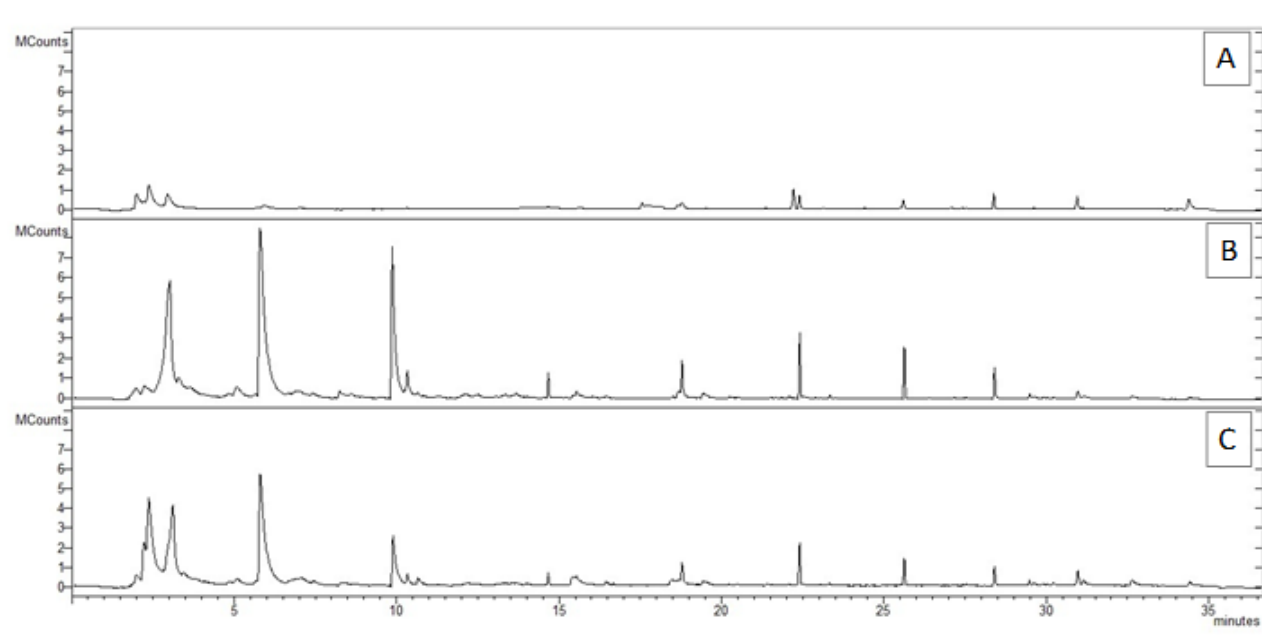



**Supplementary Table 1.** Identification of compounds detected in the volatile fraction sampled at 120 °C in the different varieties of vine shoots.

| Vine shoots 120 °C                                      |      |             |                                                 |                          |                    |                      |
|---------------------------------------------------------|------|-------------|-------------------------------------------------|--------------------------|--------------------|----------------------|
| Compound                                                | Mass | RI (Ri)     | Formula                                         | Characteristic fragments | Red wine varieties | White wine varieties |
| Difluorochloromethane                                   | 86   | 292 (258)   | CHClF <sub>2</sub>                              | 51, 67, 85               | ✓                  | ✓                    |
| Trichloromethane                                        | 118  | 642 (601)   | CHCl <sub>3</sub>                               | 83, 50, 118              | ✓                  |                      |
| 3-Methoxybutan-2-ol                                     | 104  | 677 (692)   | C <sub>5</sub> H <sub>12</sub> O <sub>2</sub>   | 59, 71, 89               | ✓                  | ✓                    |
| 3,4-Dimethyl-1-penten-3-ol                              | 112  | 755 (742)   | C <sub>7</sub> H <sub>12</sub> O                | 79, 43, 97               |                    | ✓                    |
| Hexanal                                                 | 100  | 784 (806)   | C <sub>6</sub> H <sub>12</sub> O                | 56, 72, 82               | ✓                  | ✓                    |
| 1,3,5-Trioxacycloheptane                                | 104  | 835 (806)   | C <sub>4</sub> H <sub>8</sub> O <sub>3</sub>    | 73, 61, 104              | ✓                  |                      |
| 1,2-Butanediol                                          | 90   | 790 (824)   | C <sub>4</sub> H <sub>10</sub> O <sub>2</sub>   | 59, 89, 61               | ✓                  | ✓                    |
| 2-Hydroxypropionamide                                   | 89   | 872 (891)   | C <sub>3</sub> H <sub>7</sub> NO <sub>2</sub>   | 61, 55, 74               | ✓                  |                      |
| 3-Pyridinol                                             | 95   | 915 (895)   | C <sub>5</sub> H <sub>5</sub> NO                | 95, 68, 67               |                    | ✓                    |
| 4-Pyridinol                                             | 95   | 921 (895)   | C <sub>5</sub> H <sub>5</sub> NO                | 95, 67, 55               |                    | ✓                    |
| 2,7-Dimethyl-3,5-octadiene                              | 138  | 955 (903)   | C <sub>10</sub> H <sub>18</sub>                 | 95, 81, 67               |                    | ✓                    |
| 4,6-Dimethyl-2-heptanone                                | 142  | 912 (924)   | C <sub>9</sub> H <sub>18</sub> O                | 58, 69, 85               |                    | ✓                    |
| Oxybisdichloromethane                                   | 182  | 980 (987)   | C <sub>2</sub> H <sub>2</sub> Cl <sub>4</sub> O | 83, 85, 50               |                    | ✓                    |
| 1,1-Dimethoxyheptane                                    | 160  | 1055 (1004) | C <sub>9</sub> H <sub>20</sub> O <sub>2</sub>   | 75, 55, 97               | ✓                  |                      |
| Cyclopentanecarboxylic acid                             | 114  | 1036 (1017) | C <sub>6</sub> H <sub>10</sub> O <sub>2</sub>   | 73, 86, 114              |                    | ✓                    |
| 2,3-Dimethylcyclohexanol                                | 128  | 1022 (1030) | C <sub>8</sub> H <sub>16</sub> O                | 95, 81, 110              | ✓                  |                      |
| 2-Pentylfuran                                           | 138  | 998 (1040)  | C <sub>9</sub> H <sub>14</sub> O                | 81, 53, 138              | ✓                  | ✓                    |
| Benzeneacetaldehyde                                     | 120  | 1102 (1081) | C <sub>8</sub> H <sub>8</sub> O                 | 91, 65, 120              |                    | ✓                    |
| Propanoic acid hexyl ester                              | 158  | 1062 (1083) | C <sub>9</sub> H <sub>18</sub> O <sub>2</sub>   | 57, 75, 84               | ✓                  |                      |
| 3-Undecyne                                              | 152  | 1156 (1132) | C <sub>11</sub> H <sub>20</sub>                 | 67, 81, 120              |                    | ✓                    |
| 5-Hydroxymethylfurfural                                 | 126  | 1185 (1163) | C <sub>6</sub> H <sub>6</sub> O <sub>3</sub>    | 97, 126, 69              |                    | ✓                    |
| 2-Isopropyl-5-methylcyclohexanol                        | 156  | 1202 (1164) | C <sub>10</sub> H <sub>20</sub> O               | 71, 81, 95               |                    | ✓                    |
| 6-Nonen-1-ol                                            | 142  | 1189 (1167) | C <sub>9</sub> H <sub>18</sub> O                | 67, 55, 82               |                    | ✓                    |
| Decanal                                                 | 156  | 1232 (1204) | C <sub>10</sub> H <sub>20</sub> O               | 57, 70, 82               |                    | ✓                    |
| Copaene                                                 | 204  | 1186 (1221) | C <sub>15</sub> H <sub>24</sub>                 | 105, 119, 161            | ✓                  |                      |
| 7-Methoxy-3,7-dimethyloctanal                           | 186  | 1243 (1230) | C <sub>11</sub> H <sub>22</sub> O <sub>2</sub>  | 73, 55, 69               |                    | ✓                    |
| 1-Formyl-4-hydroxymethylcyclohexane                     | 142  | 1281 (1273) | C <sub>8</sub> H <sub>14</sub> O <sub>2</sub>   | 81, 67, 95               | ✓                  |                      |
| Benzeneacetic acid, α-oxomethyl ester                   | 164  | 1271 (1296) | C <sub>9</sub> H <sub>8</sub> O <sub>3</sub>    | 105, 77, 51              |                    | ✓                    |
| 1-Undecanol                                             | 172  | 1388 (1357) | C <sub>11</sub> H <sub>24</sub> O               | 55, 69, 83               |                    | ✓                    |
| Vanillin                                                | 152  | 1412 (1392) | C <sub>8</sub> H <sub>8</sub> O <sub>3</sub>    | 152, 81, 123             |                    | ✓                    |
| 3,5-Dimethoxyacetophenone                               | 180  | 1426 (1407) | C <sub>10</sub> H <sub>12</sub> O <sub>3</sub>  | 165, 180, 137            |                    | ✓                    |
| Vanillyl methyl ketone (Guaiacylacetone)                | 180  | 1530 (1538) | C <sub>10</sub> H <sub>12</sub> O <sub>3</sub>  | 137, 180, 122            |                    | ✓                    |
| Syringaldehyde                                          | 182  | 1602 (1581) | C <sub>9</sub> H <sub>10</sub> O <sub>4</sub>   | 182, 111, 167            |                    | ✓                    |
| Methoxyeugenol                                          | 194  | 1611 (1581) | C <sub>11</sub> H <sub>14</sub> O <sub>3</sub>  | 194, 91, 119             |                    | ✓                    |
| 1-Hexadecyne                                            | 222  | 1633 (1609) | C <sub>16</sub> H <sub>30</sub>                 | 81, 67, 55               |                    | ✓                    |
| 2,6-bis(1,1-Dimethylethyl)-2,5-cyclohexadiene-1,4-dione | 220  | 1678 (1633) | C <sub>14</sub> H <sub>20</sub> O <sub>2</sub>  | 177, 220, 135            |                    | ✓                    |

|                                                              |     |             |                                                |               |   |   |
|--------------------------------------------------------------|-----|-------------|------------------------------------------------|---------------|---|---|
| 4-(3-Hydroxy-1-propenyl)-2-methoxyphenol (Coniferyl alcohol) | 180 | 1622 (1653) | C <sub>10</sub> H <sub>12</sub> O <sub>3</sub> | 137, 124, 180 | ✓ |   |
| 6-Methyl-2,4-di-tert-butyl-phenol                            | 220 | 1660 (1668) | C <sub>15</sub> H <sub>24</sub> O              | 205, 220, 57  | ✓ |   |
| 1-Heptadecyne                                                | 236 | 1688 (1709) | C <sub>17</sub> H <sub>32</sub>                | 81, 67, 55    |   | ✓ |
| 6,10,14-Trimethyl-2-pentadecanone                            | 268 | 1791 (1754) | C <sub>18</sub> H <sub>36</sub> O              | 58, 71, 109   |   | ✓ |
| 9,12-Tetradecadien-1-ol, acetate                             | 252 | 1814 (1795) | C <sub>16</sub> H <sub>28</sub> O <sub>2</sub> | 67, 81, 95    | ✓ | ✓ |
| 1-Octadecyne                                                 | 250 | 1776 (1808) | C <sub>18</sub> H <sub>34</sub>                | 81, 67, 55    |   | ✓ |
| 2-Methyl-7-octadecyne                                        | 264 | 1869 (1863) | C <sub>19</sub> H <sub>36</sub>                | 81, 67, 95    |   | ✓ |
| Hexadecanoic acid methyl ester (Methyl palmitate)            | 270 | 1891 (1878) | C <sub>17</sub> H <sub>34</sub> O <sub>2</sub> | 74, 87, 55    | ✓ | ✓ |
| 1,2-Benzenedicarboxylic acid, butyl 2-methylpropyl ester     | 278 | 1986 (1972) | C <sub>16</sub> H <sub>22</sub> O <sub>4</sub> | 149, 223, 104 |   | ✓ |
| Hexadecanoic acid ethyl ester (Ethyl palmitate)              | 284 | 1993 (1978) | C <sub>18</sub> H <sub>36</sub> O <sub>2</sub> | 43, 73, 60    | ✓ | ✓ |
| 3,7,11,15-Tetramethyl-2-hexadecen-1-ol (Phytol)              | 296 | 2071 (2045) | C <sub>20</sub> H <sub>40</sub> O              | 81, 95, 123   |   | ✓ |
| 9,12-Octadecadien-1-ol                                       | 266 | 2096 (2069) | C <sub>18</sub> H <sub>34</sub> O              | 67, 55, 81    |   | ✓ |
| 9,12,15-Octadecatrien-1-ol                                   | 264 | 2044 (2077) | C <sub>18</sub> H <sub>32</sub> O              | 79, 67, 55    |   | ✓ |
| Linolelaidic acid methyl ester                               | 294 | 2045 (2093) | C <sub>19</sub> H <sub>34</sub> O <sub>2</sub> | 67, 55, 81    | ✓ | ✓ |

**Supplementary Table 2.** Identification of compounds detected in the volatile fraction sampled at 120 °C in the different varieties of oak wood.

| Oak wood 120 °C                                            |      |             |                                                |                          |            |              |
|------------------------------------------------------------|------|-------------|------------------------------------------------|--------------------------|------------|--------------|
| Compound                                                   | Mass | RI (Ri)     | Formula                                        | Characteristic fragments | French oak | American oak |
| Propionitrile                                              | 51   | 580 (563)   | C <sub>3</sub> H <sub>5</sub> N                | 51, 50, 52               |            | ✓            |
| Trichloromethane                                           | 118  | 633 (601)   | CHCl <sub>3</sub>                              | 83, 85, 50               | ✓          | ✓            |
| Hexanal                                                    | 100  | 785 (806)   | C <sub>6</sub> H <sub>12</sub> O               | 56, 72, 82               |            | ✓            |
| Furfural                                                   | 96   | 836 (831)   | C <sub>5</sub> H <sub>4</sub> O <sub>2</sub>   | 96, 95, 67               | ✓          | ✓            |
| 2,5-Dimethyl-2-hexanol                                     | 130  | 823 (844)   | C <sub>8</sub> H <sub>18</sub> O               | 59, 69, 97               | ✓          | ✓            |
| 4-Pyridinol                                                | 95   | 910 (895)   | C <sub>5</sub> H <sub>5</sub> NO               | 95, 67, 55               |            | ✓            |
| Methyl 2-furoate                                           | 126  | 932 (909)   | C <sub>6</sub> H <sub>6</sub> O <sub>3</sub>   | 95, 126, 68              |            | ✓            |
| 3-Methyl-6-hepten-1-ol                                     | 128  | 1016 (985)  | C <sub>8</sub> H <sub>16</sub> O               | 55, 67, 95               |            | ✓            |
| Octanal                                                    | 128  | 1023 (1005) | C <sub>8</sub> H <sub>16</sub> O               | 56, 69, 84               |            | ✓            |
| 1-Ethynyl-1-cyclohexanol                                   | 124  | 1055 (1028) | C <sub>8</sub> H <sub>12</sub> O               | 81, 68, 95               | ✓          |              |
| 2-Pentylfuran                                              | 138  | 1071 (1040) | C <sub>9</sub> H <sub>14</sub> O               | 81, 53, 138              |            | ✓            |
| 5-Hydroxymethylfurfural                                    | 126  | 1182 (1163) | C <sub>6</sub> H <sub>6</sub> O <sub>3</sub>   | 97, 126, 69              |            | ✓            |
| 1-Formyl-3,5,6-trimethyl-3-cyclohexene                     | 152  | 1194 (1163) | C <sub>10</sub> H <sub>16</sub> O              | 121, 81, 67              |            | ✓            |
| 2,6-Dimethyl-2-octen-8-ol                                  | 156  | 1185 (1179) | C <sub>10</sub> H <sub>20</sub> O              | 69, 81, 55               | ✓          |              |
| 3-Allyl-2,6,6-trimethylbicyclo[3.1.1]heptane               | 178  | 1150 (1187) | C <sub>13</sub> H <sub>22</sub>                | 83, 69, 55               | ✓          |              |
| 1-Cyclohexyl-1-butanol                                     | 156  | 1209 (1241) | C <sub>10</sub> H <sub>20</sub> O              | 55, 95, 73               |            | ✓            |
| 5-Butyldihydro-4-methyl-2(3H)-furanone (cis-Oak lactone)   | 156  | 1226 (1245) | C <sub>9</sub> H <sub>16</sub> O <sub>2</sub>  | 99, 71, 87               | ✓          | ✓            |
| Vanillin                                                   | 152  | 1369 (1392) | C <sub>8</sub> H <sub>8</sub> O <sub>3</sub>   | 151, 109, 81             |            | ✓            |
| 3,4,5-Trimethoxyphenol                                     | 184  | 1499 (1468) | C <sub>9</sub> H <sub>12</sub> O <sub>4</sub>  | 169, 184, 141            |            | ✓            |
| 2,6-Dimethyl-2-octen-8-ol butyrate                         | 226  | 1487 (1501) | C <sub>14</sub> H <sub>26</sub> O <sub>2</sub> | 81, 69, 95               | ✓          |              |
| δ-Undecalactone                                            | 184  | 1526 (1503) | C <sub>11</sub> H <sub>20</sub> O <sub>2</sub> | 99, 71, 55               | ✓          |              |
| Vanillyl methyl ketone (Guaiacylacetone)                   | 180  | 1506 (1538) | C <sub>10</sub> H <sub>12</sub> O <sub>3</sub> | 137, 180, 122            | ✓          |              |
| Dodecanoic acid                                            | 200  | 1562 (1570) | C <sub>12</sub> H <sub>24</sub> O <sub>2</sub> | 60, 73, 129              | ✓          |              |
| Methoxyeugenol                                             | 194  | 1566 (1581) | C <sub>11</sub> H <sub>14</sub> O <sub>3</sub> | 194, 91, 119             | ✓          |              |
| Syringaldehyde                                             | 182  | 1583 (1581) | C <sub>9</sub> H <sub>10</sub> O <sub>4</sub>  | 182, 167, 139            | ✓          |              |
| 3-(4-Hydroxy-3-methoxyphenyl)-2-propenal (Coniferaldehyde) | 178  | 1623 (1599) | C <sub>10</sub> H <sub>10</sub> O <sub>3</sub> | 178, 135, 107            | ✓          |              |
| Acetosyringone                                             | 196  | 1639 (1628) | C <sub>10</sub> H <sub>12</sub> O <sub>4</sub> | 181, 196, 153            | ✓          |              |
| Homovanillic acid                                          | 182  | 1644 (1659) | C <sub>9</sub> H <sub>10</sub> O <sub>4</sub>  | 137, 182, 122            | ✓          |              |
| 6-Methyl-2,4-di-tert-butyl-phenol                          | 220  | 1654 (1668) | C <sub>15</sub> H <sub>24</sub> O              | 205, 220, 57             | ✓          |              |
| 9,12-Tetradecadien-1-ol                                    | 210  | 1659 (1672) | C <sub>14</sub> H <sub>26</sub> O              | 68, 81, 55               | ✓          |              |
| 6,10,14-Trimethyl-2-pentadecanone                          | 268  | 1779 (1754) | C <sub>18</sub> H <sub>36</sub> O              | 58, 71, 109              |            | ✓            |
| Ferulic acid                                               | 194  | 1772 (1767) | C <sub>10</sub> H <sub>10</sub> O <sub>4</sub> | 194, 179, 133            |            | ✓            |
| 14-Methyl-8-hexadecenal                                    | 252  | 1858 (1843) | C <sub>17</sub> H <sub>32</sub> O              | 55, 70, 83               |            | ✓            |

|                                                                |     |             |                   |              |   |   |
|----------------------------------------------------------------|-----|-------------|-------------------|--------------|---|---|
| <b>2-Methyl-7-octadecyne</b>                                   | 264 | 1881 (1863) | $C_{19}H_{36}$    | 81, 67, 95   |   | ✓ |
| <b>Hexadecanoic acid methyl ester<br/>(Methyl palmitate)</b>   | 270 | 1861 (1878) | $C_{17}H_{34}O_2$ | 74, 87, 55   | ✓ | ✓ |
| <b>9-Hexadecenoic acid methyl ester</b>                        | 268 | 1897 (1886) | $C_{17}H_{32}O_2$ | 55, 69, 74   |   | ✓ |
| <b>3,7,11,15-Tetramethyl-1-hexadecen-3-ol<br/>(Isophytol)</b>  | 296 | 1915 (1899) | $C_{20}H_{40}O$   | 71, 57, 82   |   | ✓ |
| <b>Hexadecanoic acid ethyl ester<br/>(Ethyl palmitate)</b>     | 284 | 1990 (1978) | $C_{18}H_{36}O_2$ | 43, 73, 60   | ✓ | ✓ |
| <b>3,7,11,15-Tetramethyl-2-hexadecen-1-ol<br/>(Phytol)</b>     | 296 | 2091 (2045) | $C_{20}H_{40}O_8$ | 81, 95, 123  |   | ✓ |
| <b>Methyl octadecadienoate</b>                                 | 294 | 2122 (2093) | $C_{19}H_{34}O_2$ | 67, 81, 95   |   | ✓ |
| <b>9,12-Octadecadienoic acid<br/>(Linoleic acid)</b>           | 280 | 2211 (2183) | $C_{18}H_{32}O_2$ | 67, 81, 55   | ✓ | ✓ |
| <b>1,2-Benzenedicarboxylic acid butyl<br/>cyclohexyl ester</b> | 304 | 2263 (2299) | $C_{18}H_{24}O_4$ | 149, 55, 223 | ✓ |   |
